1 TITLE: Linking nutrient stoichiometry to Zika virus transmission in a mosquito

2

3 AUTHORS: 1. Andrew S. Paige, New College of Florida, Sarasota FL 34243, USA.

4 Email: [andrew.paige15@ncf.edu](mailto:andrew.paige15@ncf.edu).

5 2. Shawna K. Bellamy, Florida Medical Entomology Laboratory, Entomology and

6 Nematology Department, Institute of Food and Agricultural Sciences, University of

7 Florida, Vero Beach, FL 32962, USA. Email: [shawnakbellamy@ufl.edu](mailto:shawnakbellamy@ufl.edu).

8 3. Barry W. Alto, Florida Medical Entomology Laboratory, Entomology and Nematology

9 Department, Institute of Food and Agricultural Sciences, University of Florida, Vero

10 Beach, FL 32962, USA. Email: [bwalto@ufl.edu](mailto:bwalto@ufl.edu).

11 4. Catherine L. Dean, University of Southern Mississippi, School of Biological,

12 Environmental, and Earth Sciences, Hattiesburg, MS 39406, USA. Email:

13 [Catherine.Dean@usm.edu](mailto:Catherine.Dean@usm.edu).

14 5. Donald A. Yee, University of Southern Mississippi, School of Biological,

15 Environmental, and Earth Sciences, Hattiesburg, MS 39406, USA. Email:

16 [Donald.Yee@usm.edu](mailto:Donald.Yee@usm.edu).

17

18 RUNNING TITLE: Linking nutrient stoichiometry to Zika virus transmission

19

20

21

22

23 ADDRESS CORRESPONDENCE TO:

24 Barry Alto

25 Florida Medical Entomology Laboratory

26 University of Florida

27 200 9<sup>th</sup> Street S.E.

28 Vero Beach, FL 32962

29 772-778-7200 ext. 153

30 Email: [bwalto@ufl.edu](mailto:bwalto@ufl.edu)

31

32

33 AUTHOR CONTRIBUTIONS: DAY and BWA conceived of and designed the project.

34 ASP and SKB carried out mosquito husbandry, viral propagation, molecular work and

35 collected project data. CLD performed the nutrient analyses and mosquito wing length

36 measurements. DAY analyzed and interpreted the data with BWA. ASP, BWA, DAY and

37 CLD wrote and edited the manuscript. All authors gave final approval for manuscript

38 publication.

39

## ABSTRACT

40  
41 Food quality and quantity serve as the basis for cycling of key chemical elements in  
42 trophic interactions, yet the role of nutrient stoichiometry in shaping host-parasite  
43 interactions is under appreciated. Most of the emergent mosquito-borne viruses  
44 affecting human health are transmitted by mosquitoes that inhabit container systems  
45 during their immature stages, where allochthonous input of detritus serves as the basal  
46 nutrients. Quantity and type of detritus (animal and plant) were manipulated in  
47 microcosms containing newly hatched *Aedes aegypti* mosquito larvae. Adult  
48 mosquitoes derived from these microcosms were allowed to ingest Zika virus infected  
49 blood and then tested for disseminated infection, transmission, and total nutrients  
50 (percent carbon, percent nitrogen, ratio of carbon to nitrogen). Treatments lacking high  
51 quality animal (insect) detritus significantly delayed development. Survivorship to  
52 adulthood was closely associated with the amount of insect detritus present. Insect  
53 detritus was positively correlated with percent nitrogen, which affected Zika virus  
54 infection. Disseminated infection and transmission decreased with increasing insect  
55 detritus and percent nitrogen. We provide the first definitive evidence linking nutrient  
56 stoichiometry to arbovirus infection and transmission in a mosquito using a model  
57 system of invasive *Ae. aegypti* and emergent Zika virus.

58

59 **Key Words:** Nutrition, ontogeny, infection, Zika virus

60

61

62

63

64

## INTRODUCTION

65 The environment experienced during development often greatly shapes adult

66 phenotypes. For animals with complex life cycles, ecological factors during the juvenile

67 stage can influence the adult stages via carry-over effects, including in fish (Green and

68 McCormick 2005, McCormick and Gagliano 2008), mosquitoes (Alto et al. 2005), and

69 other insects (Kingslover et al. 2011). In insects, and mosquitoes in particular, different

70 temperatures, habitats, and food environments can affect different life history states,

71 and thus adults may result with differential contributions to overall lifetime fitness

72 (Kingslover et al. 2011). For mosquitoes, this means that larvae exposed to different

73 stressors may have different adult life history traits including mass, development time,

74 survivorship to adulthood, and population growth, as well as and resilience to future

75 stress including pathogen challenge (Nasci 1991, Alto et al. 2012, Da-Silva Araújo et al.

76 2012). These life history traits in addition to vector competence, defined as the

77 susceptibility to pathogen infection and transmission potential, are some of the many

78 factors that influence vectorial capacity. Vectorial capacity is an index of risk of

79 pathogen transmission (Alto et al. 2008, Bara et al. 2014), and if defined as the number

80 of infectious bites a host receives per day.

81 Nutrition is an early developmental factor known to modulate life history traits. It

82 is an important factor regarding host-pathogen interactions; as host nutrition influences

83 multiple measures of adult performance, immune response, and the resources

84 necessary for pathogen replication (Lee et al. 2006, 2008; Telang et al. 2012, Yee et al.

85 2015). Larval nutritional stress can reduce the immune response of mosquitoes allowing

86 for increased pathogen infection (Sindbis virus; Muturi et al. 2011) or reduce resources  
87 for pathogen development (malaria; Vantaux et al. 2016ab). Further, nutritionally  
88 stressed larvae result in adults with reduced mass. As larger bodied mosquitoes imbibe  
89 greater volumes of blood than their smaller counterparts, one may predict that large  
90 mosquitoes would ingest higher doses of pathogen in the infected blood and may have  
91 higher infection rates, as arboviral infection is often dose dependent (Takken et al.  
92 1998, McCann et al. 2009).

93 Past studies have explored the role of nutrition in the larval environment primarily  
94 in terms of stress induced by varying quantities of laboratory or plant detritus as a  
95 substrate for microbial growth; these microbes provide the direct source of larval  
96 nutrition. Recent studies utilizing stable isotope analysis have shown that additions of  
97 animal detritus increase nitrogen availability. In particular, increases in animal detritus  
98 have positive effects on larval growth and adult phenotypes such as decreasing  
99 development time, larger mean mass, greater survivorship to adulthood, and higher  
100 estimated population growth (Yee and Juliano 2006, Murrell and Juliano 2008, Winters  
101 and Yee 2012, Yee et al. 2015). Within natural and artificial aquatic container systems  
102 such as treeholes and tires (communities dominated by immature stages of  
103 mosquitoes), primary production is nearly absent. Most of the incoming energy  
104 originates from allochthonous inputs of detritus, mainly in the form of senescent plant  
105 material (primarily leaves) and terrestrial invertebrate carcasses (Carpenter 1983, Kling  
106 et al. 2007). Invertebrate carcasses, which make up the bulk of animal detritus, have  
107 greater available nitrogen stores and a faster rate of decay than plant material, allowing  
108 for more rapid release of nutrients into the system (Yee and Juliano 2006). This

109 suggests that animal detritus scarcity could have important effects on vector  
110 competence as a limiting factor of growth, impacting a variety of adult traits, including  
111 immunity.

112 At the molecular level, immunity has several components including the  
113 production of cells that actively destroy pathogens. For example, within this pathway,  
114 nitric oxide (NO) plays a critical role in innate immunity in both vertebrates (Wink et al.  
115 2011) and insects like mosquitoes (Hillyer & Estéves-Lao 2010). Free radicals like NO  
116 are very unstable and react quickly with other molecules to acquire a stable electron  
117 configuration (Clements 2012). As an important component in immunity, it seems  
118 possible that nitrogen limitation could affect immunity against pathogens. Specifically,  
119 reactive nitrogen is linked to mosquito immunity as nitrate and hydrogen peroxide are  
120 used to synthesize NO in the mosquito midgut (Hillyer 2010).

121 In this study, we aimed to investigate the influence of various ratios of  
122 animal:plant detritus on infection and transmission of Zika virus in *Aedes aegypti*. We  
123 test the hypothesis that nutrient limitation (specifically Nitrogen limitation) during the  
124 larval stages will be associated with higher infection and transmission potential of *Ae.*  
125 *aegypti* for Zika virus. We measure total nutrients in terms of percent carbon (%C),  
126 percent nitrogen (%N), and ratio of carbon to nitrogen (C:N) in both the mosquitoes and  
127 basal resources (detritus). Inclusion of measurements of both detritus and mosquitoes  
128 allows us to provide a link between basal nutrition and the adult phenotype, in terms of  
129 nutrient stoichiometry. Although %C and %N are correlated to C:N, the latter value is  
130 reflective of the stoichiometry of the animal, in essence showing how they may balance  
131 the two elements in their body across detrital environments. Although carbon and

132 nitrogen are contained within C:N, individually they cannot enlighten us about how they  
133 act in tandem. Although we focus on *Ae. aegypti* and the Zika model system, this study  
134 has general application in addressing a gap in our understanding of how mosquito larval  
135 nutrition relates to adult nutrient stoichiometry and interactions with pathogens ingested  
136 from infected vertebrate blood.

137

## 138 MATERIALS AND METHODS

### 139 Mosquitoes and Detritus Treatments

140 *Aedes aegypti* mosquitoes used in these studies were collected as larvae from  
141 containers in Key West, FL. Larvae were reared in approximately 1.0 L of tap water in  
142 plastic trays (25 x 30 x 5 cm) with 0.40 g larval food comprised of equal amounts of liver  
143 powder and brewer's yeast at hatching and supplemented with the same amount of  
144 food 3-4 d later. Pupae were transferred to water-filled cups in 0.3 m<sup>3</sup> screened cages  
145 for emergence to adulthood. Adults were provided with 10% sucrose solution from  
146 cotton wicks and weekly blood meals from live chickens (IACUC protocol 201507682).  
147 Females laid eggs on damp paper towels in cups with water held in the cages. All life  
148 stages were maintained with a light:dark photoregime of 12:12 h at 28°C. The F<sub>17</sub>  
149 generation of parental *Ae. aegypti* were used in these experiments.

150 Larval rearing treatments consisted of ten groups that varied in the relative ratio and  
151 amount of animal (freeze-dried crickets, *Grylodes sigillatus*, Fluker Farms, Port Allen,  
152 LA, USA) to plant (senescent red maple leaves, *Acer rubrum*, collected at the Lake  
153 Thoreau Center, Hattiesburg, MS, USA 31°19'37.63"N, 89°17'25.22"W) detrital sources.  
154 Plant and animal detritus were dried for 48 hrs at 45 °C prior to use. Each detritus

155 treatment was performed in triplicate for a total of 30 experimental units (hereafter,  
156 containers). Detritus types were expressed in relative terms (1 unit of detritus equals  
157 0.15 g) of animal:plant as follows: 1:0, 2:0, 4:0, 0:5, 0:10, 1:5, 1:10, 2:5, 2:10, 4:10.  
158 These detritus treatments allow for a range of nitrogen and carbon values in adults and  
159 generally were based off past studies examining how different detrital environments  
160 affect mosquito performance and stoichiometry (e.g., Winters and Yee 2012, Yee et al.  
161 2015). To permit microbial growth for mosquito larvae to feed on, detritus was soaked  
162 for 5 d before introduction of larvae in 2.0 L plastic buckets (height, 19.05 cm; top and  
163 bottom diameters, 19.30 cm and 16.31 cm, respectively) containing 2000 mL tap water  
164 and 1000  $\mu$ L of tire water inoculum. Tire water inoculum was obtained from several tires  
165 occupied by mosquitoes and maintained on the UF-FMEL campus in Vero Beach, FL.  
166 The inoculum provided a source of microorganisms, acquired from a semi-natural  
167 setting, as food for larvae. Treatment containers were maintained with a light:dark  
168 photoregime of 12:12 h at 28°C.

169 Eggs were hatched at room temperature for 60 min in a deoxygenated water in a  
170 250 mL Erlenmeyer flask attached to a vacuum to induce synchronous hatching with  
171 0.20 g/L of larval food (Kauffman et al., 2017). Larvae were transferred to 5 L of tap  
172 water in 5 L plastic trays with an additional 0.20 g/L food. The following day, the first  
173 instar larvae were rinsed with tap water to remove larval food and 160 larvae were  
174 placed in each treatment container. The initial larval density (0.08 larvae/mL) is within  
175 the range of densities observed in field conditions in Florida among tires occupied by  
176 *Ae. aegypti* and competitor *Ae. albopictus* (Alto et al. 2005). Treatment containers were  
177 maintained in a walk-in environmental chamber at the UF-FMEL with a light:dark cycle



178 of 12:12 h set at  $28\pm 1^{\circ}\text{C}$ . Containers were checked every day and rearranged  
179 haphazardly within the environmental chamber. When present, pupae were transferred  
180 from treatment containers to polystyrene *Drosophila* culture vials with 2 to 5 mL of tap  
181 water (up to 5 pupae per tube) according to treatment conditions and sealed with a  
182 cotton plug. The date and sex of newly emerged adults from each replicate were  
183 recorded. Both males and females were housed together by treatment, replicate, and  
184 emergence date in paperboard cages with mesh screening (height by diameter: 10 cm x  
185 10 cm) and rearranged haphazardly each day in the environmental chamber. For  
186 logistical reasons, females were added into cages over a period of three days because  
187 it would have been impractical to blood feed large numbers of cages. Adults were  
188 provided with 10% sucrose solution on cotton pads. Females were 9 to 15 d old at the  
189 start of trials in which mosquitoes were allowed to ingest Zika virus infected blood.

190

## 191 **Infection Study**

192 Females were fed defibrinated bovine blood (Hemostat Laboratories, Dixon, CA)  
193 containing freshly propagated Zika virus. To encourage blood feeding, mosquitoes were  
194 deprived of sucrose, but not water, 24 h before blood-feeding trials. Infection  
195 experiments were performed in a biosafety level-3 laboratory at the UF-FMEL. Isolates  
196 of Asian lineage of Zika (strain PRVABC59, GenBank KU501215.1) from Puerto Rico  
197 were prepared in African green monkey (Vero) cells and used in the infection study.  
198 Monolayers of Vero cells were inoculated with 500  $\mu\text{L}$  of diluted stock virus (multiplicity  
199 of infection, 0.1) and incubated at 1 h at  $37^{\circ}\text{C}$  and 5%  $\text{CO}_2$  atmosphere, after which 24  
200 mL media (M199 medium supplemented with 10% fetal bovine serum,

201 penicillin/streptomycin and mycostatin) were added to each flask and incubated for 4 d.  
202 Freshly harvested media from infected cell cultures were combined with defibrinated  
203 bovine blood and adenosine triphosphate (0.005 M) and presented to mosquitoes using  
204 an artificial feeding system (Hemotek, Lancashire, UK) with hog casing membranes for  
205 1 hr feeding trials. Carbon dioxide from the sublimation of dry ice was used to stimulate  
206 blood feeding three times every 20 min. Samples of infected blood were taken at the  
207 time of feedings and stored at -80 °C for later determination of virus titer. Mosquitoes  
208 were fed 6.5 - 7.5 log<sub>10</sub> plaque forming units (pfu)/mL of Zika.

209 Following blood feeding trials, fully engorged mosquitoes were sorted using light  
210 microscopy and held in cages, maintained at 12:12 hour L:D photoperiod and at 28 °C.  
211 Partially fed (average of 2%) and unfed females (average of 9%) were discarded.  
212 Mosquitoes were provided with an oviposition substrate and 10% sucrose solution on  
213 cotton pads.

#### 214 **Zika virus Disseminated Infection, and Transmission Potential**

215

216 Mosquito tissues were tested for Zika infection 15 d after ingestion of infected blood.  
217 Mosquito legs and saliva were tested for Zika RNA as indicators of Zika disseminated  
218 infection (Turell et al. 1984) and transmission potential, respectively (i.e., the presence  
219 of viral RNA in saliva is a proxy for transmission). Partitioning mosquito tissues for  
220 testing allowed us to determine treatment-induced changes in barriers to infection (e.g.,  
221 midgut escape barrier and salivary gland barriers). Mosquitoes were cold anesthetized  
222 (4 °C), and the legs were removed using light microscopy. Legs were placed in 1 mL of  
223 incomplete media (M199) and stored at -80 °C until testing. Using forceps, one wing  
224 was damaged to immobilize the mosquito and the proboscis was inserted into a

225 capillary tube for a 1-h collection of saliva in type B immersion oil using methods  
226 described by Alto et al. (2014). Following collection of saliva, mosquito bodies were  
227 stored at -80 °C until nutrient analysis testing. Saliva and oil were expelled into 300 µL  
228 of media (M199) and stored at -80 °C until testing. Each treatment replicate yielded  
229 multiple mosquitoes and so infection measures are reported as percent infection per  
230 replicate.

231  
232 **RNA Extraction and Reverse Transcriptase Quantitative Polymerase Chain**  
233 **Reaction (RT-qPCR)**

234 Legs and bodies were homogenized using a TissueLyser (Qiagen, Valencia, CA) in  
235 1000 µL media after which a 140 µL sample of homogenate was clarified by  
236 centrifugation and used for RNA isolation with the QIAamp viral RNA mini kit (Qiagen,  
237 Valencia, CA) following the manufacturer's protocol. Saliva samples were processed  
238 similarly, but with no homogenization. Viral RNA was eluted in 50 µL buffer and  
239 quantitative RT-PCR was used to determine the presence and quantity of viral RNA  
240 using the Superscript III One-Step qRT-PCR with Platinum® Taq kit (Invitrogen,  
241 Carlsbad, CA) with the C1000 Touch Thermal Cycler, CFX96 Real-Time System (Bio-  
242 Rad Laboratories, Hercules, CA). The mastermix used 2.2µL molecular grade water,  
243 1µL forward primer, 1µL reverse primer, 10µL 2X reaction mix, 0.4µL ZIKV probe, 0.4µL  
244 Taq polymerase, and 5µL of mRNA template. Primers and probe sets synthesized by  
245 IDT (Integrated DNA Technologies, Coralville, IA) had the following sequences:

246 Forward Primer, 5'- CTTCTTATCCACAGCCGTCTC-3'

247 Reverse Primer, 5'- CCAGGCTTCAACGTCGTTAT-3'

248 Probe, 5'-/56-FAM/AGAAGGAGACGAGATGCGGTACAGG/3BHQ\_1/- 3'

249 The program for qRT-PCR consisted of a 30-min step at 50°C linked to a 40-cycle PCR  
250 (94°C for 12 s and 58°C for 60 s). A standard curve was used to quantify viral load (titer)  
251 of Zika in mosquito tissues by comparing cDNA synthesis to a range of serial dilutions  
252 of Zika in parallel with plaque assays of the same dilution of virus, expressed as pfu  
253 equivalents/mL (Bustin 2000).

### 254 **Carbon and Nitrogen Analysis**

255 Mosquito species can vary in nutrient content, both based on larval diet and  
256 inherent differences among species (e.g., Yee et al. 2015). Carbon is the principle  
257 building block of life, and can vary with across diet. In addition, as container systems for  
258 developing *Aedes albopictus*, like tree holes, are nitrogen limited (Carpenter 1983) we  
259 focused on percent body nitrogen as well. For nutrient analysis, mosquitoes and detritus  
260 were prepared by drying in an oven for at least 48 hrs at 50°C. Each weighed sample  
261 (mosquito and detritus) was encapsulated in 5 x 9 mm pressed tin capsules (Costech  
262 Analytical, Valencia, CA, USA) before analysis. Mosquito body samples and detritus  
263 samples were analyzed for total nutrients (%C, %N, C:N) using a ECS 4010 Elemental  
264 Combustion System (Costech Analytical Technologies, California). Although %C and  
265 %N are correlated to C:N, the latter value is reflective of the stoichiometry of the animal,  
266 in essence showing how they may balance the two elements in their body across  
267 detrital environments. Although carbon and nitrogen are contained within C:N,  
268 individually they cannot enlighten us about how they act in tandem.

### 269 **Estimated Finite Rate of Increase**

270 In many cases, life history traits correlate with per capita rate of change. An estimate  
271 of the per capita rate of change is feasible in experiments where populations are  
272 established as cohorts and indirect measures of survivorship, fecundity and generation  
273 time are available (Livdahl and Sugihara 1984, Juliano 1998). An estimate of the finite  
274 rate of increase ( $\lambda'$ ) was calculated for each replicate container by initially calculating  
275 the estimated instantaneous rate of increase ( $r'$ , Livdahl and Sugihara 1984):

$$\lambda' = \exp(r') = \exp \frac{\ln [(1/N_0) \sum_x A_x f(w_x)]}{D + [\sum_x x A_x f(w_x) / \sum_x A_x f(w_x)]}$$

279 where  $N_0$  is the initial number of females in the cohort (assumed to be 50%);  $A_x$  is the  
280 number of females emerging to adulthood on day  $x$ ;  $D$  is the time from emergence to  
281 reproduction taken as 12 d for *Ae. aegypti* (Grill and Juliano 1996);  $f(w_x)$  is a function  
282 based on the relationship between size and fecundity in female mosquitoes. For *Ae.*  
283 *aegypti*  $f(w_x) = 2.5 w_x - 8.616$  (Briegel 1990).

## 284 **Statistical Analysis**

285 Analysis of variance (ANOVA) was used to test for larval treatment effects on male  
286 development time, survivorship to adulthood, and the estimate of the finite rate of  
287 increase ( $\lambda'$ ). Multivariate analysis of variance (MANOVA) was used to test for treatment  
288 effects on adult female development time and mass. Standardized canonical  
289 coefficients were used to describe the relative contribution and relationship of the  
290 response variables to the multivariate treatment effect. Differences in response  
291 variables among treatment groups were identified using the Tukey-Kramer HSD post-

292 hoc test for multiple comparisons. Stepwise multiple regression analysis was used to  
293 relate infection measures (disseminated infection, saliva infection) to detrital conditions  
294 (%N, amount of animal detritus) and %C, %N, C:N signatures in adult females (pooled  
295 across treatments). All statistical analyses were performed using SAS software (2004).  
296 A randomization ANOVA was used to analyze treatment effects on  $\lambda'$  due to no  
297 transformations allowing us to meet assumptions of normality and heteroscedasticity.

298

299

## RESULTS

### 300 Mosquito Life History

301 Multivariate analysis of variance showed significant effects of treatment on female  
302 development time and mass (Pillai's trace  $_{18,34} = 1.72$ ). Standardized canonical  
303 coefficients showed that development time contributed almost twice as much as mass  
304 to the significant treatment effect (SCCs, development time = -2.50, mass = 1.42).  
305 Females with the longest development times were associated with reduced mass (Fig.  
306 1).

307 Treatment levels lacking animal detritus displayed significantly delayed development  
308 time for both female and male mosquitoes ( $F_{8,25} = 45.42$ ,  $P < 0.001$ ). Plant only  
309 treatments showed delayed development compared to treatment levels with animal  
310 detritus (with or without plant) (Figs. 1 and 2). No significant differences were found  
311 when treatment levels included at least one unit of animal detritus. No male survivors  
312 were observed in the treatment 0:5.

313 There was a significant effect of treatment on mosquito weights. Mosquitoes were  
314 the heaviest in treatment levels with at least two units of animal detritus, regardless of

315 how much plant detritus was present (Fig. 1). Mosquitoes were intermediate in weight  
316 with one unit of animal detritus, regardless of the amount of leaf detritus was preset  
317 (Fig. 1). The lightest mosquitoes were produced in habitats with only leaf detritus  
318 present (Fig. 1).

319 Survivorship to adulthood was closely associated with the amount of animal detritus  
320 present ( $F_{9,27} = 10.53$ ,  $P < 0.001$ ). Increases in basal resources, especially inclusion of  
321 animal detritus, yielded higher survivorship compared to plant detritus only situations  
322 (Fig. 3). The highest survivorship was observed in treatments containing 2:5 and 2:10  
323 units of animal:plant detritus. An intermediate to high survivorship was seen in  
324 treatments containing 1:10, 2:0, 4:0, and 4:10 units of animal:plant detritus, and  
325 intermediate to low survivorship in treatments containing 1:0 and 1:5 units of  
326 animal:plant detritus. The lowest survivorship was seen in treatments lacking animal  
327 detritus (Fig. 3).

328 A randomization ANOVA showed marginally non-significant treatment effects on  $\lambda'$   
329 ( $F_{9,19} = 2.28$ ,  $P = 0.062$ , Fig. 4). In general,  $\lambda'$  values were significant higher in  
330 combinations of animal and leaf detritus compared to leaf-only treatment levels. In most  
331 cases populations were estimated to be growing ( $\lambda' > 1$ ).

### 332 **Zika Virus Disseminated Infection and Transmission**

333 Disseminated infection (stepwise regression: animal,  $F_{1,20} = 65.44$ ,  $P < 0.001$ ,  
334  $R^2 = 0.75$ ; animal+leaf,  $F_{2,20} = 4.54$ ,  $P = 0.046$ ,  $R^2 = 0.05$ ; %N,  $F_{1,24} = 9.23$ ,  $P = 0.006$ ) and  
335 transmission potential (stepwise regression,  $F_{1,22} = 20.30$ ,  $P < 0.001$ ) decreased with  
336 increasing animal detritus and %N (Figs. 5, 6, and 7). Disseminated infection was  
337 highest with treatment levels containing only one unit of animal detritus, intermediate in

338 treatment levels containing two units of animal detritus, and low in treatment levels  
339 containing four units of animal detritus. Overall, adult females showed an average of  
340  $4.66 \pm 0.09\%$  nitrogen,  $54.39 \pm 0.54\%$  carbon, and a  $12.20 \pm 0.26\%$  C:N ratio across all  
341 detritus ratios.

342

343

## DISCUSSION

344 We found support for our hypothesis that variation in animal and leaf detritus would  
345 alter Zika virus infection and transmission by *Ae. aegypti*. The infection component of  
346 our study revealed that quantity and quality of nutrition, and the associated changes in  
347 nutrient stoichiometry, altered disseminated infection and transmission potential of Zika  
348 virus. Particularly, animal detritus was positively correlated with %N, which affected Zika  
349 virus infection. Disseminated infection and transmission decreased with increasing  
350 animal detritus and %N. Thus, we provide the first definitive evidence linking nutrient  
351 stoichiometry to arbovirus infection and transmission in a mosquito, using a model  
352 system of *Ae. aegypti* and Zika virus. Future studies should consider using lower  
353 generation of mosquitoes (e.g., F1 generation from field-collected parents) which are  
354 likely to be more representative of populations in the wild. The observed resource  
355 quality mechanism mediating interactions between *Ae. aegypti* and Zika may apply to  
356 other arboviruses and mosquito species. For instance, stoichiometric composition was  
357 similar for both *Ae. aegypti* *Ae. albopictus* across different diet environments (Yee et al.  
358 2015). These two species are often implicated in the same transmission cycles (e.g.,  
359 chikungunya, Zika, dengue; Gubler 1998, Coffey et al. 2014, Boyer et al. 2018), so  
360 further work will be needed to determine if our findings of the relationships between



361 stoichiometry and viral infection are applicable to *Ae. albopictus*. Although the  
362 mechanism for the observed results in the current study is unclear, it may relate to  
363 increased immune activity and reduced pathogen propagation, as observed in other  
364 systems (Cotter et al. 2011, Cornet et al. 2014, Brunner et al. 2014, Howick and  
365 Lazzaro 2014).

366 We were interested in producing females who would exhibit a range of nitrogen and  
367 carbon values and thus we used different combinations of high-quality animal and low-  
368 quality leaf detritus. Although we did produce a gradient (4.27 – 5.29 %N across diets),  
369 our diets yielded nitrogen values at the lower end of those produced elsewhere. For  
370 instance, in a laboratory experiment Yee et al. (2015) produced female *Ae. aegypti* with  
371 a range of 7.60 - 10.19 %N across diets using the same types but higher amounts of  
372 detritus per individual. Carbon levels were more similar, with our study producing adults  
373 with 51.38 – 58.78 %C whereas Yee et al. (2015) had a range of 45.75 - 55.45 %C.  
374 Thus, our diets produced females that were likely more stressed for limited nitrogen,  
375 although at present there are no published data from wild mosquitoes to know if the  
376 lower values produced in this study fall within the typical range for field collected adults.  
377 However, as our animals seemed more stressed for nitrogen and females in higher  
378 nitrogen containers had lower average disseminated infection, this does suggest that  
379 nitrogen does play a role in affecting vector-pathogen interactions; a mechanism which  
380 has not been explored elsewhere.

381 We observed that variation in the amount and relative ratio of animal to plant  
382 detritus altered individual life history trait responses of mosquitoes including  
383 development time to adulthood, mass (net growth), and survivorship to adulthood.

384 Greater amounts of animal detritus and %N consistently shortened development time  
385 and resulted in heavier adults with higher survivorship. Thus, we were able to  
386 demonstrate that %N reflected, in presence of animal detritus, affected a variety of life  
387 history traits and rate of female infection. These observations are consistent with a  
388 study that demonstrated reduced development time and increased adult mass for *Ae.*  
389 *aegypti* and *Ae. albopictus* but not *Culex quinquefasciatus* in animal versus leaf only  
390 environments (Yee et al. 2015). Nutrient analyses showed that *Aedes* tissues varied in  
391 their C:N ratio dependent on animal and leaf detritus ratios, whereas *Cx.*  
392 *quinquefasciatus* showed a less plastic response in C:N ratio (Yee et al. 2015). This  
393 suggests that nutrient content, and not type of detritus, influenced life history traits.

394 In the current study, an estimate of the finite rate of increase ( $\lambda'$ ) showed trends for  
395 different responses to the quantity and quality of nutrition. Specifically, the presence of  
396 animal detritus, either alone or in combination with leaf detritus, increased population  
397 growth relative to treatments with only leaf detritus present. However, this effect was  
398 only marginally non-significant. We hypothesized that increased variance attributable to  
399 treatments that had no survivors ( $\lambda' = 0$ ) was, in part, responsible for lack of significance  
400 as the low nutrient treatments showed drastically delayed development time and  
401 reduced survivorship. To test this hypothesis, we re-ran the analysis omitting replicates  
402 with no survivors (i.e., where  $\lambda' = 0$ ). Results showed a significant treatment effect ( $F_{9,17}$   
403 = 8.77,  $P < 0.001$ ) in the anticipated direction, despite reductions between treatment  
404 means among treatments, thus providing support for the hypothesis that increased  
405 variance was a contributing factor to the marginally non-significant result. This trend  
406 should not be taken lightly, as nutrient pulses within microcosms such as tree holes or

407 tires are common. Further, spatio-temporal pulses of nitrogen in the form of animal  
408 detritus may account for rapid flux in mosquito populations with varying competence  
409 and longevity affecting disease transmission dynamics (Kling et al. 2007, Yee 2008,  
410 Yee and Juliano 2012).

411 Frost et al. (2008) observed rich nutrition in *Daphnia magna* water fleas enhanced  
412 growth and reproduction of a bacterial parasite (*Pasteuria ramosa*) and Vantuax et al.  
413 (2016b) reported a lesser likelihood of infection in females exposed to a reduced  
414 quantity of laboratory diet in the larval stages. Discrepancies in these observations may  
415 be, in part, attributable to the notion that elemental nutrition may alter parasite and  
416 pathogen infection dynamics at different stages of the infection cycle (Alto et al. 2015,  
417 Borer et al. 2016). Further, living pathogens, such as malaria parasites or *P. ramosa*,  
418 must acquire nutrients from the host environment to grow and reproduce whereas  
419 viruses must hijack host replication machinery to replicate. Calorie restriction has been  
420 shown to either decrease or increase resistance to parasitism (reviewed in Cotter et al.  
421 2011). The mechanism(s) may be, in part, related to the observation that different  
422 immune traits (e.g., phenoloxidase activity and lysozyme-like antibacterial activity)  
423 respond differently to nutrient uptake, as demonstrated in the Egyptian cotton leafworm  
424 (Cotter et al. 2011). At present, the mechanism for why *Ae. aegypti* females would be  
425 less susceptible to infection by Zika when nitrogen levels are greater is unclear.  
426 However, given that container systems that produce adults are often limited by nitrogen  
427 (Carpenter 1983), this area of research could prove fruitful for linking fine-scale patterns  
428 of resource environments to human outbreaks of arbovirus induced disease. Although  
429 the present study was limited by the amount of tissue required to perform elemental

430 analysis for C, N, and P, future investigations should include of the role of phosphorus  
431 and other essential elements to understand the role of limiting nutrients in infection.

432 Our study showed that infection traits map onto different regions of nutrient space as  
433 observed by other studies (Cotter et al. 2011). The effects of dietary intake on nutrient  
434 stoichiometry and subsequently on immunity in insects has only been investigated in a  
435 handful of disparate taxa (Lee et al. 2008). However, it is known that activation or  
436 maintenance of immunity often involves use of protein reserves (Lee et al. 2006), which  
437 is likely consistent with nitrogen availability. Thus, our results provide a starting point to  
438 investigate the wider role of nutrients, including nitrogen, in affecting mosquito-pathogen  
439 interactions of important human diseases.

440 Adult mosquitoes derived from nutrient rich environments containing insect detritus  
441 had greater mass and body size than adults from treatments with less detritus,  
442 especially those with little or no animal detritus. Although larger mosquitoes consume  
443 greater volumes of blood, therefore ingesting higher doses of Zika, we considered the  
444 possibility that they might have higher rates of infection. However, the pattern that we  
445 observed was the opposite of this prediction. Specifically, larger adults from nutrient rich  
446 larval environments had lower disseminated infection and saliva infection rates than  
447 smaller conspecifics. This observation suggests that differences in infection rates are  
448 not attributable to differences in volume of infected blood ingested. Rather, we  
449 speculate that the overall health of the mosquito determined by larval nutrient  
450 environments, may influence infection and progression of infection (advanced states of  
451 infection). Another possibility is that larger blood meals may provide a greater influx of  
452 nitrogen. Consequently, some blood meal resources for reproduction may trade off with

453 energy reserves to fight an infection in order to live long enough to reproduce  
454 successfully which would likely be adaptive and favored by selection. Other studies  
455 investigating mosquito larval nutrition (amount of plant detritus or quantity of laboratory  
456 diet) and competition have observed similar impacts on adult life history traits or  
457 competence (LaCrosse virus, Grimstad and Haramis 1984; Sindbis virus, Alto et al.  
458 2005; dengue virus, Alto et al. 2008ab). However, we are the first to quantify nitrogen  
459 limitation and demonstrate its role in arboviral infection and transmission potential.  
460 Invasive *Ae. albopictus* and native *Ae. triseriatus* container mosquitoes derived from  
461 nutrient rich larval environments were less likely to exhibit disseminated infection and/or  
462 to transmit dengue-2 virus (Zhang et al. 1993) and LaCrosse encephalitis virus  
463 (Grimstad and Haramis 1984, Grimstad and Walker 1991, Paulson and Hawley, 1991),  
464 respectively, than conspecifics from nutrient-deprived larvae. Additionally, these nutrient  
465 effects carried-over to the next generation as demonstrated with maternal effects on  
466 offspring infection with LaCrosse virus. This may have important epidemiological  
467 consequences given that vertical transmission is a mechanism for persistence of  
468 LaCrosse in the environment (Patrician and DeFoliart 1985). Thus, we propose that  
469 larval diet, with specific reference to the nutrients it contains, is a mechanism that  
470 affects nutrient composition and allocation patterns in *Ae. aegypti*; it may be an  
471 important but overlooked component to understanding transmission potential of  
472 arboviruses across different resource environments.

473 Larval nutrition alters several phenotypic traits related to mosquito fitness that are  
474 relevant to their ability to transmit pathogens (Beldomenico and Begon 2010) such as  
475 longevity (Steinwascher 1982, Haramis 1985), host-seeking behavior (Nasci 1986,

476 Klowden et al. 1988), biting persistence (Nasci 1991), blood-feeding success (Nasci  
477 1986), and fecundity (Steinwascher 1982, Vantaux et al. 2016a). It is likely that  
478 enhanced infection associated with nutrient deprivation may also have consequences  
479 for these other life history traits, so mathematical models are needed to evaluate the net  
480 effect on risk of arbovirus transmission (Bara et al. 2014).

481

482

483

484

### **ACKNOWLEDGMENTS**

485 An isolate of Zika virus was kindly provided by the Centers for Disease Control and  
486 Prevention. We thank A. Carels, B. Eastmond, S. Ortiz, K. Wiggins, and R. Zimler for  
487 technical support with experiments. K. Kuehn provided technical support for nutrient  
488 analysis of mosquitoes.

489

490

491  
492  
493  
494  
495  
496  
497  
498  
499  
500  
501  
502  
503  
504  
505  
506  
507  
508  
509  
510  
511  
512  
513

## LITERATURE CITED

- Aalto SL, Decaestecker E, Pulkkinen K (2015) A three-way perspective of stoichiometric changes on host-parasite interactions. *Trends Parasitol* 31:333–340.
- Alto BW, Lounibos LP, Higgs S, Juliano SA (2005) Larval competition differentially affects arbovirus infection in *Aedes* mosquitoes. *Ecology* 86:3279–3288.
- Alto BW, Reiskind MH, Lounibos LP (2008) Size Alters Susceptibility of Vectors to Dengue Virus Infection and Dissemination. *Am J Trop Med Hyg* 79:688–695.
- Alto BW, Muturi EJ, Lampman RL (2012) Effects of nutrition and density in *Culex pipiens*. *Med Vet Entomol* 26:396–406.
- Alto BW, Connelly CR, O’Meara GF, Hickman D, Karr N (2014) Reproductive biology and susceptibility of Florida *Culex coronator* to infection with West Nile virus. *Vector Borne and Zoonotic Dis* 14(8):606-614.
- Bara J, Rapti Z, Cáceres CE, Muturi EJ (2014) Effect of larval competition on extrinsic incubation period and vectorial capacity of *Aedes albopictus* for dengue virus. *PLoS ONE* 10(5):e0126703.doi:10.1371/journal.pone.0126703.
- Beldomenico PM, Begon M (2010) Disease spread, susceptibility and infection intensity: vicious circles? *Trends Ecol Evol* 25 (1): 21-27.
- Borer ET, Laine AL, Seabloom EW (2016) A multiscale approach to plant disease using the metacommunity concept. *Annu Rev Phytopathol* 54: 397-418.
- Boyer S, Calvez E, Chouin-Carneiro T, Diallo D, Failloux A-B (2018). An overview of mosquito vectors of Zika virus. *Microbes Infect* 11-12: 646-660.
- Briegel H (1990) Metabolic relationship between female body size, reserves, and fecundity of *Aedes aegypti*. *J Insect Physiol* 36:165-172.

- 514 Brunner FS, Schmid-Hempel P, Barribeau SM (2014) Protein-poor diet reduces host-  
515 specific immune gene expression in *Bombus terrestris*. Proc R Soc B 281:  
516 20140128.
- 517 Buckner EA, Alto BW, Lounibos LP (2016) Larval temperature-food effects on adult  
518 mosquito infection and vertical transmission of dengue-1 virus. J Med Entomol  
519 53:91–98.
- 520 Bustin SA (2000) Absolute quantification of mRNA using real-time reverse transcription  
521 polymerase chain reaction assays. J Mol Endocrinol 25:169–193.
- 522 Carpenter SR (1983) Resource limitation of larval treehole mosquitoes subsisting on  
523 beech detritus. Ecology 64:219–223.
- 524 Clements AN (2012) The Biology of Mosquitoes. Vol. 3. Transmission of viruses and  
525 interactions with bacteria. CABI, Oxford.
- 526 Cornet S, Bichet C, Larcombe S, Faivre B, Sorci G (2014) Impact of host nutritional  
527 status on infection dynamics and parasite virulence in a bird-malaria system. J Anim  
528 Ecol 83: 256-265.
- 529 Coffey LL, Failloux A-B, Weaver SC (2014) Chikungunya virus-vector interactions.  
530 Viruses 6: 4628-4663.
- 531 Cotter SC, Simpson SJ, Raubenheimer D, Wilson K (2011) Macronutrient balance  
532 mediates trade-offs between immune function and life history traits. Funct Ecol  
533 25:186-198.
- 534 Da-Silva Araújo M, Gil LHS, de-Almeida e-Silva A (2012) Larval food quantity affects  
535 development time, survival and adult biological traits that influences the vectorial  
536 capacity of *Anopheles darlingi* under laboratory conditions. Malaria J 11:261.



- 537 Green BS, McCormick MI (2005) Maternal and paternal influences determine size,  
538 growth and performance in tropical reef fish larvae. *Mar Ecol Prog Ser.* 289:263–72.
- 539 Grill CP, Juliano SA (1996) Predicting species interactions based on behaviour:  
540 predation and competition in container-dwelling mosquitoes. *J Anim Ecol* 65: 63-76.
- 541 Grimstad PR, Haramis LD (1984) *Aedes triseriatus* (Diptera: Culicidae) and La Crosse  
542 virus III. Enhanced oral transmission by nutrition-deprived mosquitoes. *J Med*  
543 *Entomol* 21: 249-256.
- 544 Grimstad PR, Walker ED (1991). *Aedes triseriatus* (Diptera: Culicidae) and La Crosse  
545 virus. IV. Nutritional deprivation of larvae affects the adult barriers to infection and  
546 transmission. *J Med Entomol* 28: 378-386.
- 547 Gubler DJ (1998) Dengue and dengue hemorrhagic fever. *Clin Microbiol Rev* 11:480-  
548 496.
- 549 Haramis L (1985) Larval nutrition and adult ecology. *Mosquito Ecology: Proceedings of*  
550 *a Symposium* (ed. by L.P. Lounibos & J. Rey), pp. 431-439. University of Florida  
551 Press, Gainesville, FL.
- 552 Hillyer JF (2010) Mosquito immunity. *Adv Exp Med Biol* 708: 218-238.
- 553 Hillyer JF, Estéves-Lao TY (2010) Nitric oxide is an essential component of the  
554 hemocyte-mediated mosquito immune response against bacteria. *Dev Comp*  
555 *Immunol* 34:141-149.
- 556 Juliano SA (1998) Species introduction and replacement among mosquitoes:  
557 Interspecific resource competition or apparent competition? *Ecology* 79: 255-268.
- 558 Kauffman E, Payne A, Franke MA, Schmid MA, Harris E, Kramer LD (2017) Rearing of  
559 *Culex* spp. and *Aedes* spp. Mosquitoes. *Bio Protoc* 7:e2542

- 560 Kingsolver JG, Woods HA, Buckley LB, Potter KA, MacLean HJ, Higgins JK (2011)  
561 Complex life cycles and the responses of insects to climate change. *Int*  
562 *Comp Biol.* 51:719–32.
- 563 Kling LJ, Juliano SA, Yee DA (2007) Larval mosquito communities in discarded vehicle  
564 tires in a forested and unforested site: detritus type, amount, and water nutrient  
565 differences. *J Vector Ecol* 32:207–17.
- 566 Klowden MJ (1986) Effects of sugar deprivation on the host-seeking behaviour of gravid  
567 *Aedes aegypti* mosquitoes. *J Insect Physiol* 32: 479-483.
- 568 Lee KP, Cory JS, Wilson K, Raubenheimer D, Simpson SJ (2006) Flexible diet choice  
569 offsets protein costs of pathogen resistance in a caterpillar. *Proc R Soc B* 273:823–  
570 829.
- 571 Lee KP, Simpson SJ, Wilson K (2008) Dietary protein quality influences melanization  
572 and immune function in an insect. *Funct Ecol* 22:1052-1061.
- 573 Livdahl, TP, Sugihara G (1984) Non-linear interactions of populations and the  
574 importance of estimating per capita rates of change. *J Anim Ecol* 53: 573-580.
- 575 McCann S, Day JF, Allan S, Lord CC (2009) Age modifies the effect of body size on  
576 fecundity in *Culex quinquefasciatus* Say (Diptera: Culicidae). *J Vector Ecol* 34:174-  
577 181
- 578 McCormick MI, Gagliano M (2008) Carry-over affects-the importance of a good start. In:  
579 *Proc 11th Int Coral Reef Sym Ses.* 10: 305–10
- 580 Murrell EG, Juliano SA (2008) The role of detritus type in interspecific competition and  
581 population distributions of *Aedes aegypti* and *Aedes albopictus* (Diptera: Culicidae).  
582 *J Med Entmol* 45:375–383.

- 583 Muturi EJ, Kim CH, Alto BW, Berenbaum MR, Schuler MA (2011) Larval environmental  
584 stress alters *Aedes aegypti* competence for Sindbis virus. *Trop Med Int Health*  
585 16:955–964.
- 586 Nasci RS (1986) The size of emerging and host-seeking *Aedes aegypti* and the relation  
587 of size to blood-feeding success in the field. *J Am Mosq Control Assoc* 2: 61-62.
- 588 Nasci RS (1991) Influence of larval and adult nutrition on biting persistence in *Aedes*  
589 *aegypti* (Diptera: Culicidae). *J Med Entomol* 28:522-526.
- 590 Patrican LA, DeFoliart GR (1985) Lack of adverse effect of  
591 transovarially acquired La Crosse virus infection on the reproductive capacity of  
592 *Aedes triseriatus* (Diptera: Culicidae). *J Med Entomol* 22: 604–611.  
593
- 594 Steinwascher K (1982) Relationship between pupal mass and adult survivorship and  
595 fecundity for *Aedes aegypti*. *Environ. Entomol.* 11: 150-153.
- 596 Takken W, Klowden MJ, Chambers GM (1998) Effect of body size on host seeking and  
597 blood meal utilization in *Anopheles gambiae sensu stricto* (Diptera: Culicidae): the  
598 disadvantage of being small. *J Med Entomol* 35: 639-645.
- 599 Telang A, Qayum AA, Parker A, Sacchetta BR, Byrnes GR (2012) Larval nutritional  
600 stress affects vector immune traits in adult yellow fever mosquito *Aedes aegypti*  
601 (*Stegomyia aegypti*). *Med Vet Entomol* 26: 271-81.
- 602 Turell MJ, Gargan TP, Bailey C (1984) Replication and dissemination of Rift Valley fever  
603 virus in *Culex pipiens*. *Am J Trop Med Hyg* 33: 176-181.
- 604 Vantaux A, Lefèvre T, Cohuet A, Dabiré KR, Roche B, Roux O (2016a) Larval nutritional  
605 stress affects vector life history traits and human malaria transmission. *Sci Rep* 6:1–  
606 10.

- 607 Vantaux A, Ouattarra I, Lefèvre T, Dabiré KR (2016b) Effects of larvicidal and larval  
608 nutritional stresses on *Anopheles gambiae* development, survival and competence  
609 for *Plasmodium falciparum*. *Parasit Vectors* 9:1–11.
- 610 Wink DA, Hines HB, Cheng RYS, Switzer CH, Flores-Santana W, Vitek MP, Ridnour  
611 LA, Colton CA (2011) Nitric oxide and redox mechanisms in the immune response. *J*  
612 *Leukoc Biol* 89:873-791.
- 613 Winters AE, Yee DA (2012) Variation in performance of two co-occurring mosquito  
614 species across diverse resource environments: Insights from nutrient and stable  
615 isotope analyses. *Ecol Entomol* 37:56–64.
- 616 Yee DA (2008) Tires as habitats for mosquitoes: a review of studies within the eastern  
617 United States. *J Med Entomol* 45:581–593.
- 618 Yee DA, Juliano SA (2012) Concurrent effects of resource pulse amount, type, and  
619 frequency on community and population properties of consumers in detritus-based  
620 systems. *Oecologia* 169:511-522.
- 621 Yee DA, Kaufman MG, Ezeakacha NF (2015) How diverse detrital environments  
622 influence nutrient stoichiometry between males and females of the co-occurring  
623 container mosquitoes *Aedes albopictus*, *Ae. aegypti*, and *Culex quinquefasciatus*.  
624 *PLoS ONE* 10(8):1–19. e0133734.
- 625 Yee DA, Juliano SA (2006) Consequences of detritus type in an aquatic microsystem:  
626 Effects on water quality, micro-organisms and performance of the dominant  
627 consumer. *Freshwater Biol* 51:448–459.

- 628 Young GB, Golladay S, Covich A, Blackmoore M (2014) Stable isotope analysis of  
629 larval mosquito diets in agricultural wetlands in the coastal plain of Georgia, U.S.A. J  
630 Vector Ecol 39:288–297.
- 631 Zhang S, He G, Xu L, Lin Q, Zhang S (1993) Effects of larval nutrition on susceptibility  
632 of *Aedes albopictus* to dengue 2 virus. Arbovirus Research in Australia 6: 44-48.

633 **Figure 1.** MANOVA of bivariate least square means of female mass and development  
634 time across different nutrient environments as represented by different ratios of animal  
635 (crickets) and leaf (red maple) detritus. Means that do not share same letters are  
636 significantly different, and bars indicate standard error of the mean. Lowercase letters  
637 are for mass and uppercase letters are for development time.

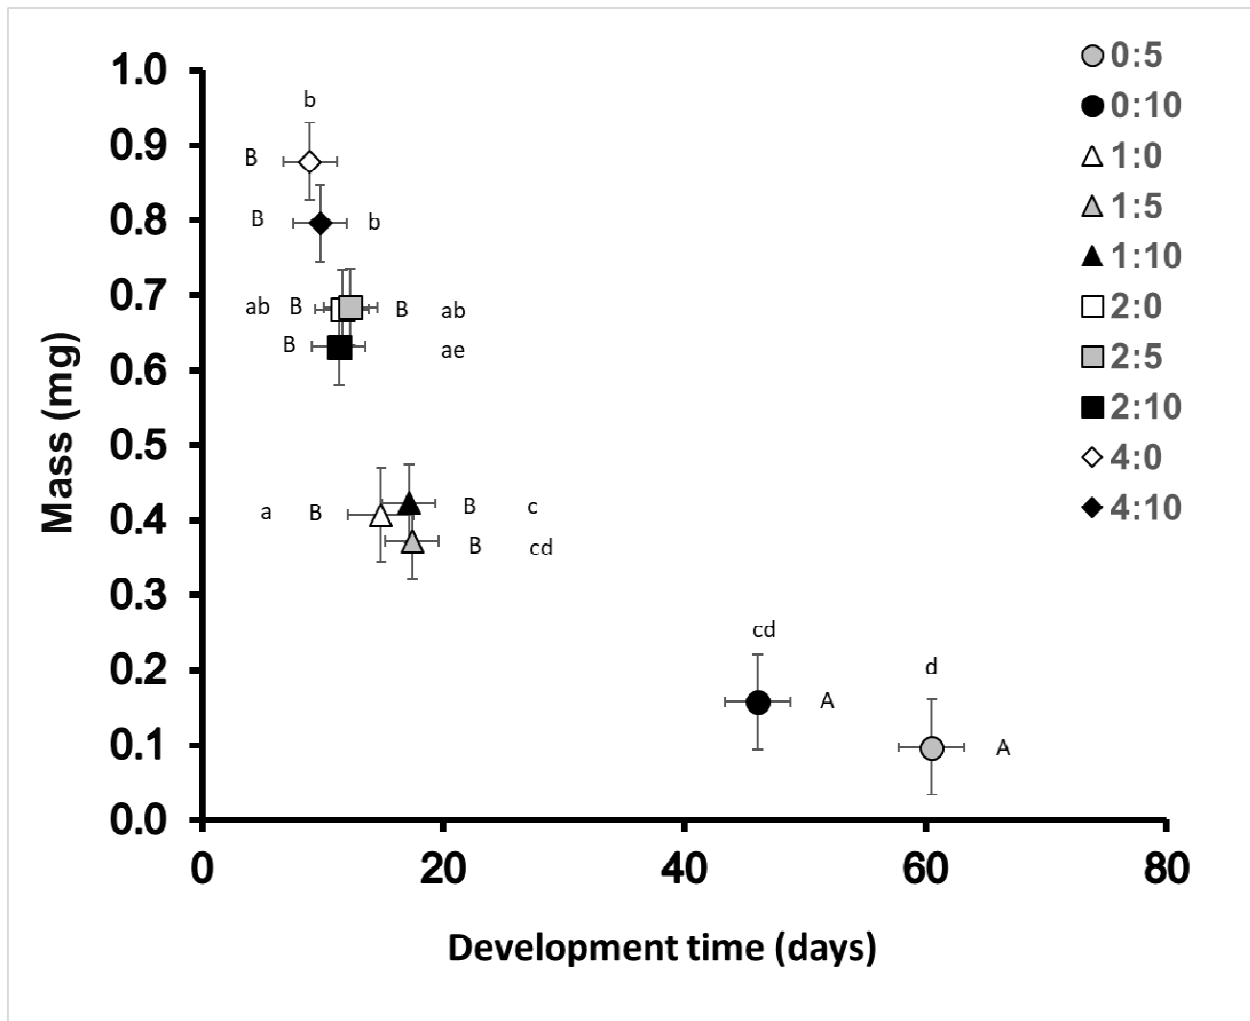

638

639

640

641 **Figure 2.** ANOVA of least square means of male development time across different  
642 environments as represented by different ratios of animal (crickets) and leaf (red maple)  
643 detritus. Means that do not share same letters are significantly different, and bars  
644 indicate standard error of the mean.

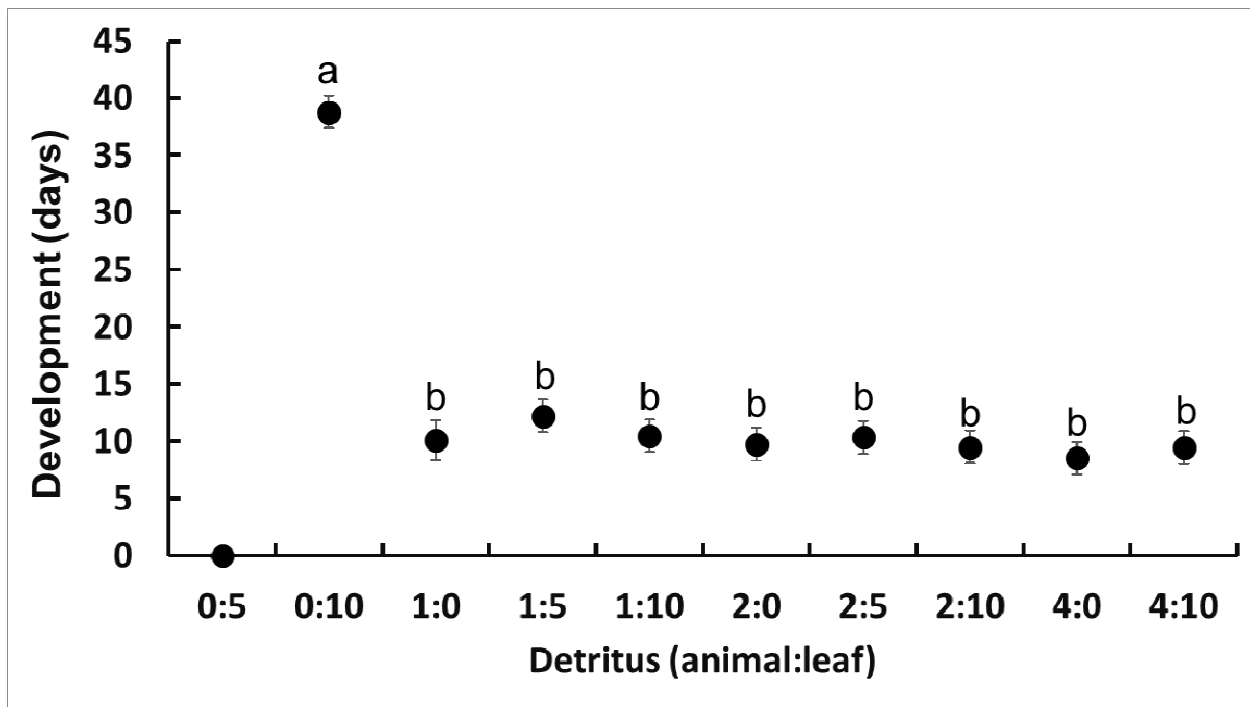

645

646

647

648

649

650

651

652

653 **Figure 3.** ANOVA of least square means of percent survivorship to adulthood  
654 (male+female, expressed as percent total of initial cohort of larvae added to containers)  
655 across different nutrient environments as represented by different ratios of animal  
656 (crickets) and leaf (red maple) detritus. Means that do not share same letters are  
657 significantly different, and bars indicate standard error of the mean.

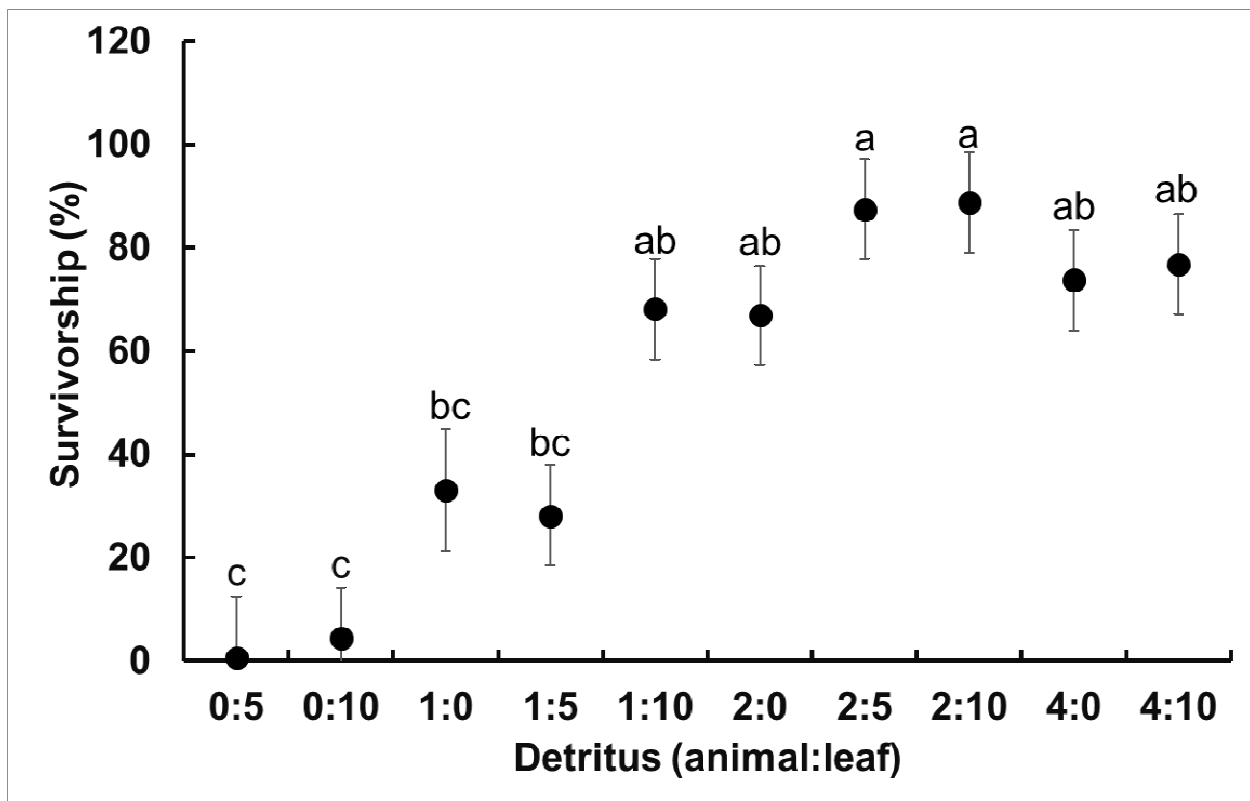

658

659

660

661

662



663 **Figure 4.** Values of the estimate of the finite rate of increase ( $\lambda'$ ) for *Aedes aegypti*  
664 females across animal and leaf environments. Nutrient environments are represented  
665 by different ratios of animal (crickets) and leaf (red maple) detritus. Values that share a  
666 letter are not significantly different at  $P > 0.05$ . The dashed line at  $\lambda'$  represents  
667 populations for which growth is estimated to be zero.

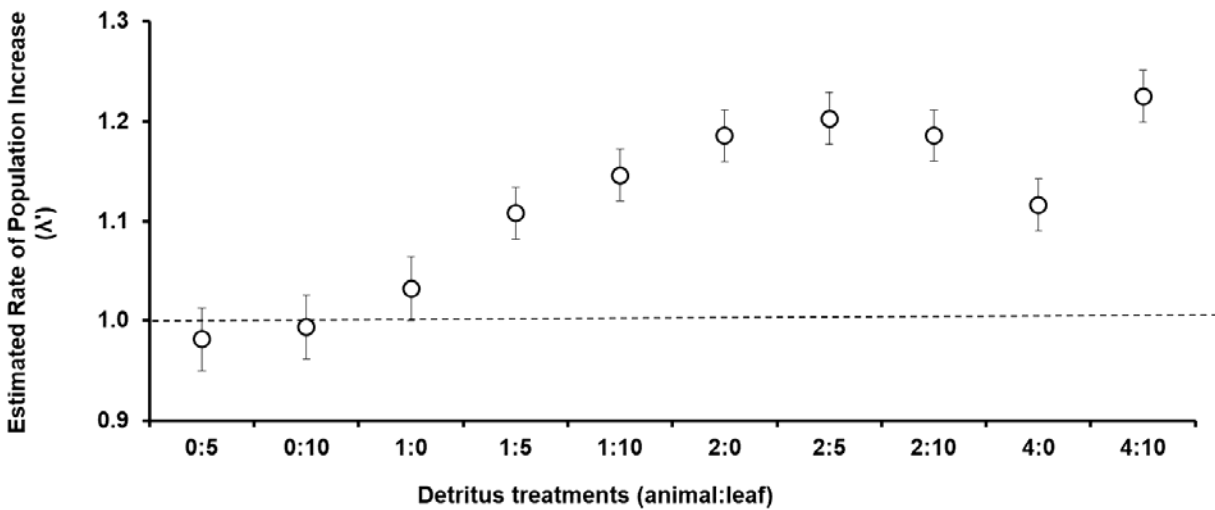

668

669

670

671

672

673

674

675 **Figure 5.** Stepwise multiple regression (%C, %N, C:N) on the proportion of positive  
676 mosquitoes in each treatment. Each point represents a replicate for each treatment  
677 (%N,  $F_{1,24} = 9.23$ ,  $P = 0.006$ ).

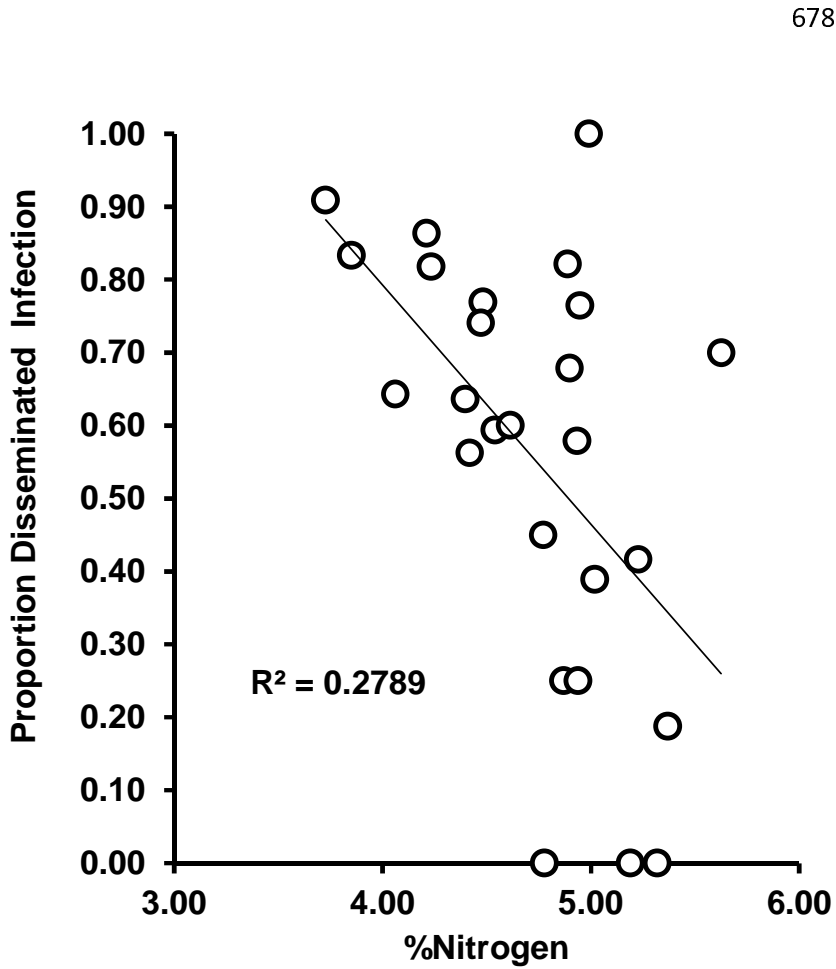

691 **Figure 6.** Stepwise multiple regression (%C, %N, C:N) on the proportion of positive  
692 mosquitoes in each treatment. Each point represents a replicate for each treatment  
693 (%N,  $F_{1,24} = 9.23$ ,  $P = 0.006$ ).

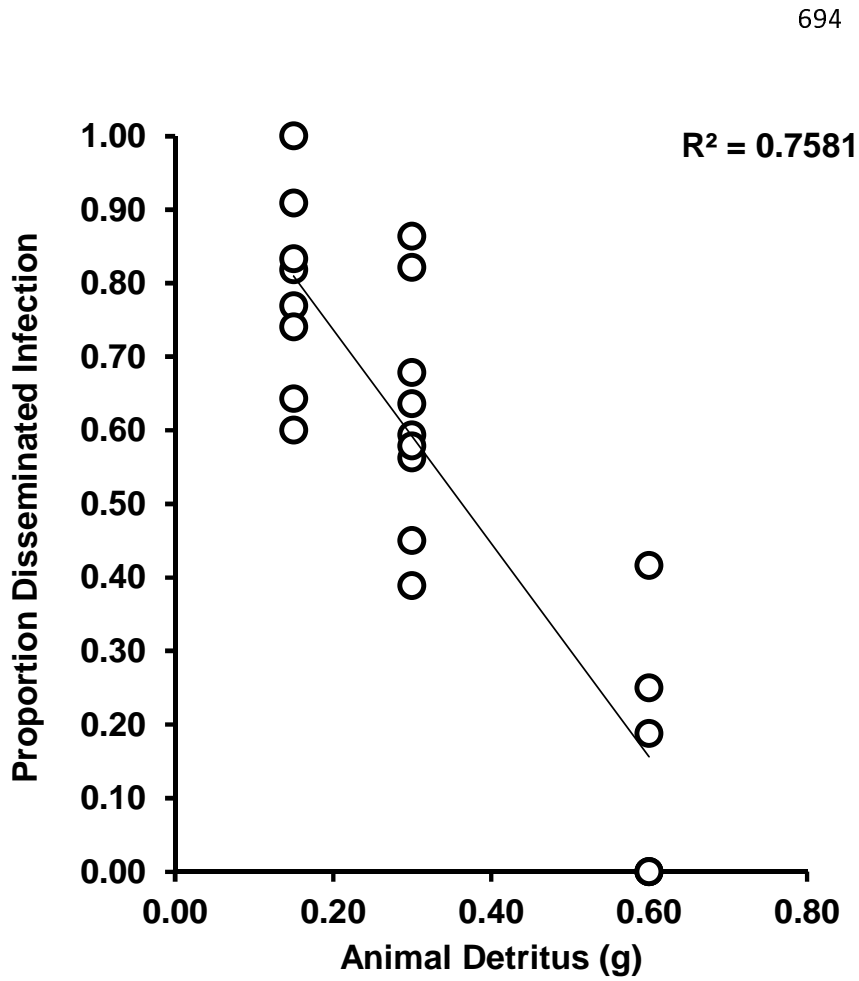

704

705

706

707 **Figure 7.** Stepwise multiple regression (animal detritus and leaf detritus (g)) on the  
708 proportion of mosquitoes with positive saliva infection in each treatment. Each point  
709 represents a replicate for each treatment (Animal,  $F_{1,22} = 20.30$ ,  $P < 0.001$ ,  $R^2 = 0.4617$ ;  
710 Leaf, not significant).

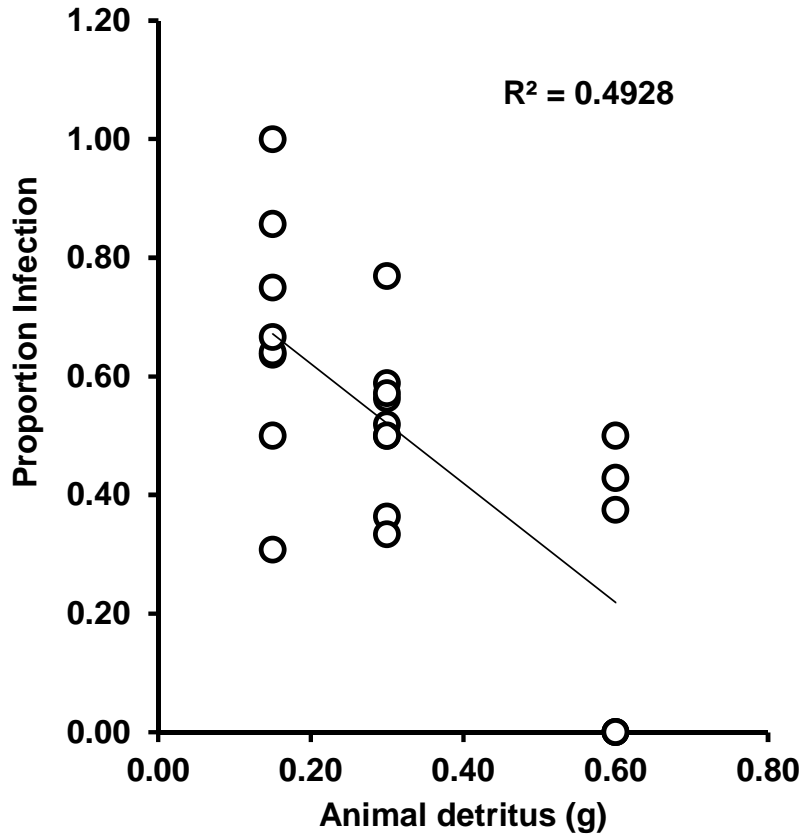

711

712

713
